CORRECTION

# Correction: Selective serotonin reuptake inhibitors and venlafaxine in pregnancy: Changes in drug disposition

Andreas Austgulen Westin, Malin Brekke, Espen Molden, Eirik Skogvoll, Olav Spigset

The affiliation for the 1st author is incomplete. Andreas Austgulen Westin is affiliated with #1 and #6.

There is an error in the caption for [Fig 1](#), “Inclusion flow chart.” Please see the complete, correct [Fig 1](#) caption here.

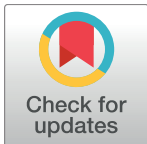

## OPEN ACCESS

**Citation:** Westin AA, Brekke M, Molden E, Skogvoll E, Spigset O (2018) Correction: Selective serotonin reuptake inhibitors and venlafaxine in pregnancy: Changes in drug disposition. PLoS ONE 13(1): e0191508. <https://doi.org/10.1371/journal.pone.0191508>

**Published:** January 16, 2018

**Copyright:** © 2018 Westin et al. This is an open access article distributed under the terms of the [Creative Commons Attribution License](#), which permits unrestricted use, distribution, and reproduction in any medium, provided the original author and source are credited.

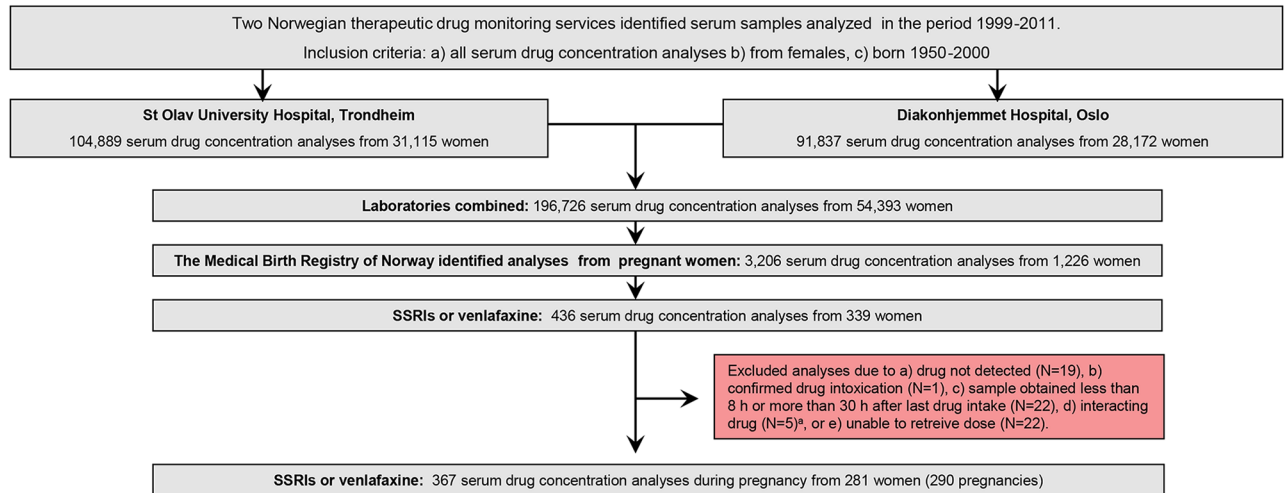

**Fig 1. Inclusion flow chart.** Sample identification and inclusion of therapeutic drug monitoring samples of selective serotonin reuptake inhibitors and venlafaxine obtained during pregnancy. <sup>a</sup> Five analyses were excluded due to the following drug interactions: sertraline + carbamazepine (n = 1), venlafaxine + bupropion (n = 4).

<https://doi.org/10.1371/journal.pone.0191508.g001>

## Reference

1. Westin AA, Brekke M, Molden E, Skogvoll E, Spigset O (2017) Selective serotonin reuptake inhibitors and venlafaxine in pregnancy: Changes in drug disposition. *PLoS ONE* 12(7): e0181082. <https://doi.org/10.1371/journal.pone.0181082> PMID: 28708853
